# Nanoscale robots exhibiting quorum sensing

Yaniv Amir<sup>1</sup>, Almogit Abu-Horowitz<sup>1</sup>, Justin Werfel<sup>2</sup>, Ido Bachelet<sup>1,3</sup>

1. Augmanity Nano, Rehovot, Israel.
2. Wyss Institute for Biologically-inspired Engineering, Harvard University, Cambridge, MA, USA.
3. Author for correspondence. Address: 8 Hamada Street, Rehovot 7670308, Israel. Tel. +972 54621 6664. Email: [dogbach@gmail.com](mailto:dogbach@gmail.com)

## Keywords

DNA nanotechnology, nanorobotics, quorum sensing, collective behaviors.

## Abstract

Multi-agent systems demonstrate the ability to collectively perform complex tasks—e.g., construction<sup>1-2</sup>, search<sup>3</sup>, and locomotion<sup>4,5</sup>—with greater speed, efficiency, or effectiveness than could a single agent alone. Direct and indirect coordination methods allow agents to collaborate to share information and adapt their activity to fit dynamic situations. A well-studied example is quorum sensing (QS), a mechanism allowing bacterial communities to coordinate and optimize various phenotypes in response to population density. Here we implement, for the first time, bio-inspired QS in robots fabricated from DNA origami, which communicate by transmitting and receiving diffusing signals. The mechanism we describe includes features such as programmable response thresholds and quorum quenching, and is capable of being triggered by proximity of a specific target cell. Nanoscale robots with swarm intelligence could carry

out tasks that have been so far unachievable in diverse fields such as industry, manufacturing and medicine.

Quorum Sensing (QS) is a well-studied example of collective behavior<sup>6</sup>. This mechanism of cell-cell communication in bacteria utilizes secreted signal molecules to coordinate the behavior of the group. Linking signal concentration to local population density enables each single bacterium to measure population size. This ability to communicate both within and between species is critical for bacterial survival and interaction in natural habitats and has likely appeared early in evolution. Detection of a minimal threshold of signal molecules, termed autoinducers, triggers gene expression and subsequent behavior response. Using these signaling systems, bacteria synchronize particular behaviors on a population-wide scale and thus function as multicellular organisms<sup>6-9</sup>.

QS-inspired approaches have been adopted in artificial systems, including mobile robots<sup>10</sup> and wireless sensor networks<sup>11</sup>, and naturally occurring genes have been harnessed in synthetic biology to implement QS at the cellular level<sup>12</sup>.

Recently we reported a new type of nanoscale robot, fabricated from DNA origami<sup>13</sup>, which logically actuates between “off” and “on” states<sup>14-15</sup>. By using various types of DNA logic based on aptamer recognition, toehold-mediated strand displacement<sup>15</sup>, etc., these robots can be programmed to respond to diverse stimuli and either present or sequester molecular payloads anchored to the inside of the device. In the present study we aimed to program the robots to exhibit collective behavior, taking advantage of the more elaborate modes of control that such behaviors enable.

The basis for collective behaviors is communication between agents, and QS was chosen as a simple, programmable mechanism to establish it. We designed and constructed a bio-inspired QS system based on an autoinducer which is released by each individual robot into the environment (**Figure 1a**). The concentration of this signal is thus proportional to the robot population size, and each individual robot is able to detect it and respond in a concentration-dependent fashion. To achieve this, a molecule previously utilized as a “key” to open the robot, recombinant human platelet-derived growth factor (PDGF)<sup>14-15</sup>, was used as an autoinducer. PDGF was loaded into the robot using a peptide tether cleavable by matrix metalloproteinase (MMP)-2 (**Fig. 1a**). Thus, MMP-2 was set as an external signal initiating QS, and changing its activity enabled us to tune the rate of autoinducer release. Importantly, due to the hollow cylindrical shape of the robot, MMP-2 can freely diffuse in and out of the robot and operate inside it in both its closed and open states, while PDGF has to be cleaved and released from the robot by MMP-2, in order for other robots to sense and respond to it.

The autoinducer release mechanism can be potentially adapted to any environment. For example, one could exploit the inherent instability of RNA for the gradual release of signal from the robots. Alternatively, a UV-cleavable tether would release the signal only upon exposure of the robots to sunlight or another direct source of UV radiation. Choosing enzymes such as MMPs as releasing factors has a therapeutic rationale, as it only initiates QS where enzyme activity is enriched, such as around or directly on metastasizing tumors<sup>16</sup>.

The closed robots are hollow shells enabling small molecules such as proteins to freely diffuse in and out of them. Specifically here, the protein diffusing in and out is the release

factor MMP-2, which when inside releases PDGF (tethered to the robot by the MMP-2 substrate polypeptide). The released PDGF can now also freely diffuse out of the robot, and build up a concentration of PDGF in the environment. In contrast, any attached payload (e.g. reporter molecule or unreleased PDGF) is only accessible to beads or other solid phase-based assays when the robot is open. Therefore, all robots – closed and open – participate in generating the PDGF concentration in the environment, but only the open robots contribute to the detectable signal. Robots loaded with autoinducers were placed in MMP-2-containing buffer at various population densities (from 29 to 18,000 pM). Population density-dependent activation of the robots was demonstrated using both flow cytometry and dynamic light scattering analysis (**Fig. 1b-c**). Flow cytometry clearly showed distinct, QS-driven robot activation behavior displayed between the constitutively off and constitutively on curves (**Fig. 1c**).

Engineered QS enables the tuning of response thresholds to fit various conditions or desired behaviors. Here this was achieved by modifying the aptamer gate that responds to the QS signal. In the robot, the aptamer that binds the autoinducer is normally hybridized to a partially-complementary strand, from which it displaces in the presence of the signal as previously shown<sup>14-15</sup>. By changing the number of mismatches in the complementary strand, displacement can be made to occur at lower signal concentrations and with faster kinetics. We used this approach to successfully alter QS-driven behavior in robots (**Fig. 2a**).

Our QS system can be tuned also via quorum quenching (QQ), by neutralizing or sequestering the autoinducer. To achieve QQ, we used a neutralizing anti-PDGF antibody<sup>14</sup> that effectively negated PDGF binding to its aptamer on the robot, causing

robots to switch to off even though their concentration was high enough to induce QS-driven activation (**Fig. 2b**). The efficacy of QQ depended on the ability of the neutralizing antibody to compete with the aptamers for autoinducer binding.

We next loaded the robots with antibody Fab' fragments for the human receptor Siglec-7 (CDw328), whose cross-linking on leukemic cells induces growth arrest leading to apoptosis<sup>17</sup>. Jurkat cells (leukemic T cells) were chosen as target cells as they express Siglec-7<sup>18</sup> and also exhibit high levels of MMP-2 activity after activation with cytokines<sup>19</sup>. The cells were treated with varying concentrations of QS-regulated robots for 24 hours. Cell cycle analysis demonstrated cell-triggered QS leading to robot activation and subsequent growth arrest, as no other releasing factor was added to the medium (**Fig 3**). This highlights the potential of QS as an artificial therapeutic control mechanism that could be utilized in a variety of conditions, given that the proper system is designed with a target-associated releasing factor in mind, such as tumor-derived proteases, bacterial restriction nucleases, etc. A library of autoinducer tethers, each cleavable by a different signal, could be constructed to fit specific needs and environmental conditions.

In this work we implement, for the first time, collective behavior in molecular robots using a bio-inspired mechanism. The design presented here bears many similarities to bacterial QS, while carrying additional features such as the ability to be activated in response to chosen stimuli. Our work also provides a platform for the engineering of more elaborate communication schemes utilizing several sub-populations differing in autoinducer type and response thresholds, with desirable features as control systems for therapeutics and manufacturing.

## Acknowledgements

We are extremely grateful to S. M. Douglas, D. Y. Zhang and A. Marblestone for their valuable advice and comments on the manuscript. We thank all the members of the Bachelet lab at Bar Ilan University for support, technical help and valuable discussions. This work was supported by a European Research Council Starting Grant (ERC-StG-335332).

## Conflict of interest

The authors declare competing financial interest: Y. A., A. A-H. and I. B. are employees of Augmanity Nano Ltd, a for-profit research organization studying applications of DNA nanotechnology..

## References

1. Turner, J. S. (2005) Extended physiology of an insect-built structure. *American Entomologist* **51**, 36-38.
2. Petersen K. Nagpal, R., Werfel, J. (2011) TERMES: An Autonomous Robotic System for Three-Dimensional Collective Construction. *Robotics: Science & Systems* **7**.
3. Wood, R., Nagpal, R. & Wei, G. Y. (2013) Flight of the robobees. *Scientific American* **308**, 60-65.
4. Bonner, J. T. (2009) *The social amoebae : the biology of cellular slime molds*. Princeton University Press.

5. Murata, S. & Kurokawa, H. (2007) Self-Reconfigurable Robots. *Robotics & Automation Magazine* **14**, 71-78.
6. Visick, K. L. & Fuqua, C. (2005) Decoding microbial chatter: Cell-cell communication in bacteria. *J Bacteriol.* **16**, 5507-5519.
7. Miller, M. B. & Bassler, B. L. (2001) Quorum sensing in bacteria. *Annual Review of Microbiology* **55**, 165-199.
8. Bassler, B. L. & Losick, R. (2006) Bacterially speaking. *Cell* **125**, 237-246.
9. Nadell, C. D., Xavier, J. B., Levin, S. L., Foster, K. R. (2008) The evolution of quorum sensing in bacterial biofilms. *PLoS Biol.* **6**, e14.
10. Hsieh, M. A., Halasz, A., Berman, S., & Kumar, V. (2008) Biologically inspired redistribution of a swarm of robots among multiple sites. *Swarm Intelligence* **2**, 121-141.
11. Ibisio, W., Shum, L. L., Sacks, L., Marshall, I. (2005) A biologically-inspired clustering algorithm dependent on spatial data in sensor networks. *Wireless Sensor Networks* **2**, 386-390.
12. Weiss, R. & Knight, T. F. (2001) Engineered communications for microbial robotics. *Lecture notes in Computer Science* **2054**, 1-16.
13. Pinheiro, A. V., Han, D., Shih, W. M., Yan, H. (2011) Challenges and opportunities for structural DNA nanotechnology. *Nature Nanotechnology* **6**, 763–772.
14. Douglas, S. M., Bachelet, I. & Church, G. M. (2012) A logic-gated nanorobot for targeted transport of molecular payloads. *Science* **335**, 831-834.

15. Amir, Y., Ben-Ishay, E., Levner, D., Ittah, S., Abu-Horowitz, A., Bachelet, I. (2014) Universal computing by DNA origami robots in a living animal. *Nat. Nanotechnol.* **9**, 353–7.
16. Egeblad, M. & Werb, Z. (2002) New functions for the matrix metalloproteinases in cancer progression. *Nature Reviews Cancer* **2**, 161-174.
17. Vitale, C., Romagnani, C., Falco, M., Ponte, M., Vitale, M., Moretta, A., Bacigalupo, A., Moretta L. & Mingari M. C. (1999) Engagement of p75/AIRM1 or CD33 inhibits the proliferation of normal or leukemic myeloid cells. *Proc Natl Acad Sci USA.* **96**, 15091-15096.
18. Ikehara, Y., Ikehara, S. K. & Paulson, J. C. (2004) Negative regulation of T cell receptor signaling by Siglec-7 (p70/AIRM) and Siglec-9. *The Journal of biological chemistry* **279**, 43117-43125.
19. Kossakowska, A. E., Edwards, D. R., Prusinkiewicz, C., Zhang, M. C., Guo, D., Urbanski, S. J., Grogan, T., Marquez, L. A., Janowska-Wieczorek, A. (1999) Interleukin-6 regulation of matrix metalloproteinase (MMP-2 and MMP-9) and tissue inhibitor of metalloproteinase (TIMP-1) expression in malignant non-Hodgkin's lymphomas. *Blood* **94**, 2080-2089.



**Figure 1**

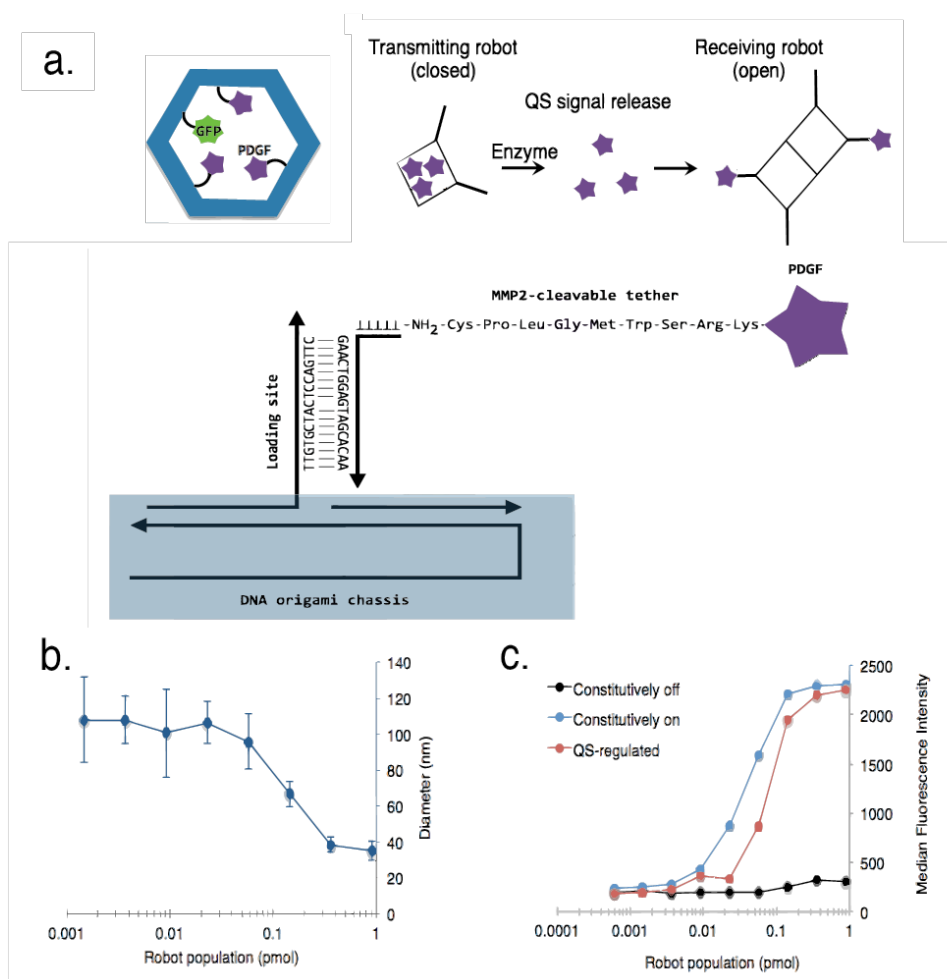

**Figure 1: QS in DNA robots.** 1A, Schematic design of QS system. PDGF was linked chemically to an MMP2-cleavable peptide tether, to form the autoinducer. This conjugate was further linked to a DNA sequence complementary to the DNA origami-associated loading site sequence (bottom). A mixture of autoinducer and GFP was loaded inside the robot (top left, seen from the side). MMP2 releases the autoinducers from a transmitting robot (in a closed state), these reach a receiving robot, switching it from closed to open (top right). 1B-C, Population-dependent behavior of QS robots. Robots were placed in MMP2-containing buffer in various population sizes in a fixed volume and their state was monitored using dynamic light scattering (1B) or flow cytometry (1C), using beads coated with anti-GFP antibodies.

**Figure 2**

**a)**

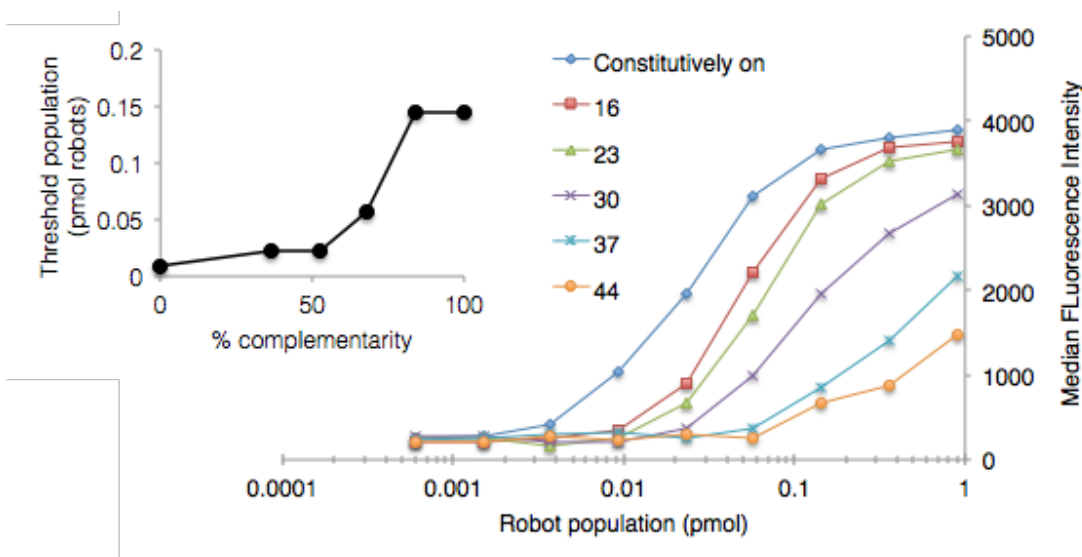

**b)**

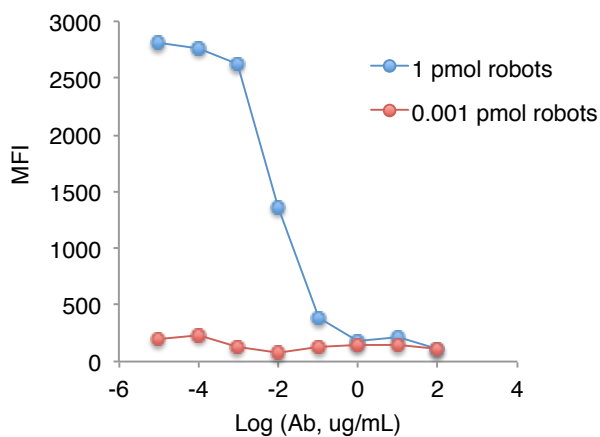

**Figure 2: Tuning the behavior of QS robots.** QS behavior can be tuned through either the autoinducer-sensing mechanism or through sequestering the autoinducer itself. 2A, reducing complementarity between the DNA strands comprising the robot gate enables to tune the threshold and kinetics of QS behavior. Each curve corresponds to a number of matching bases (max. complementarity: 44 bases; min. complementarity: 16 bases). Inset shows quantitative link between % complementarity and the threshold population of

robots, i.e. the first population with detectable effect. 2B, sequestration of the autoinducer by a neutralizing anti-PDGF antibody enables quorum quenching (QQ).

**Figure 3**

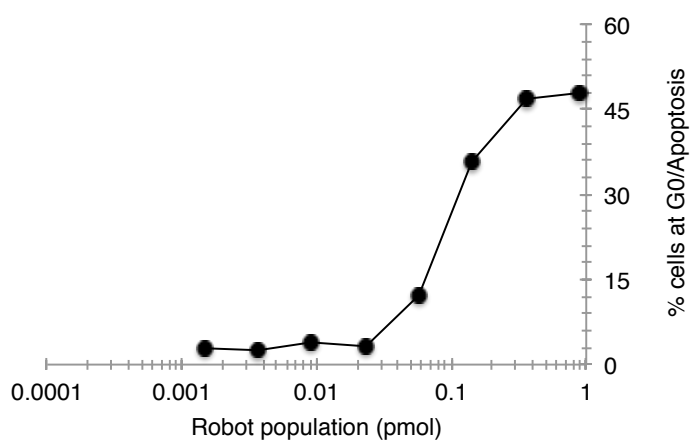

**Figure 3: Target cell-triggered QS.** Cytokine-activated Jurkat T cells were treated with QS robots loaded with a growth-suppressing antibody (anti-Siglec-7). No MMP-2 was added to the medium as in the previous experiments. QS was driven by MMP2 released from the target cells, leading to subsequent growth arrest. Cells were fixed after treatment and analyzed for cell cycle distribution by flow cytometry.

## Supplementary Notes

### Supplementary Note 1: robot design and fabrication

DNA origami robots were designed using caDNAno (<http://www.cadnano.org>) and fabricated as previously described. The M13mp18 circular ssDNA was used as scaffold strand. Staple strands were ordered from Integrated DNA technologies.

### Supplementary Table 1: M13mp18 sequence

```
TAGTTGCATATTTAAAACATGTTGAGCTACAGCATTATATTAGCAATTAAGCTCTAAGCCATCCGCAAAAATGACCTCTATCAAAG
GAGCAATTAAGGTACTCTAATCCTGACCTGTTGGAGTTTGCTCCGGTCTGGTTCGCTTTGAAGCTCGAATAAAACGCGATATTT
GAAGCTTTTCGGGCTTCTCTAATCTTTTGGATGCAATCCGCTTTGCTTCTGACTATAATAGTCAGGGTAAAGACCTGATTTTGATT
TATGGTCATTCTCGTTTTCTGAACGTGTTAAAGCATTGAGGGGGATTCAATGAATATTTATGACGATCCGCGATTGGACGCTATC
CAGTCTAAACATTTACTATTACCCCTCTGGCAAACTCTTTTGCAAAAAGCCTCTCGCTATTTTGGTTTTATCGTCGCTGGTAAA
CGAGGGTTATGATAGTGTGCTTACTATGCCTCGTAATTCCTTTGGCGTTATGATCTGCATTAGTTGAATGTGGTATTCCTAAAT
CTCAACTGATGAATCTTCTACCTGTAATAATGTTGTTCCGTTAGTTCGTTTTATTAACGTAGATTTTCTCCCAACGCTCCTGACTGG
TATAATGAGCCAGTTCTTAAAATCGCATAAAGTAATTACAATGATTAAAGTTGAAATTAACCATCTCAAGCCAAATTTACTACTCGT
TCTGGTGTTCCTCGTCAGGGCAAGCCTTATTCACTGAATGAGCAGCTTTGTTACGTTGATTGGGTAATGAATATCCGGTCTTGTCAA
GATTACTCTTGATGAAGGTGACCCAGCCTATGCGCCTGGTCTGTACACCGTTTATCTGCTCTTTCAAAGTTGGTCAAGTTCGGTCCC
TTATGATTGACCGTCTGCGCCTGTTCCGGCTAAGTAACATGGAGCAGGTCGCGGATTCGACACAATTTATCAGGCGATGATACAAAT
CTCCGTTGTACTTTGTTTCGCGCTTGGTATAATCGCTGGGGTCAAAGATGAGTGTGTTTAGTGTATTCTTTGCTCTTTCCGTTTTAGG
TTGGTGCCTTCGTAGTGGCATTACGTATTTTACCGTTTAAATGAAACTTCTCATGAAAAAGTCTTTAGTCTCAAAGCCTCTGTAGC
CGTTGCTACCTCGTTCCGATGCTGCTTTTCGCTGCTGAGGGTACGATCCCGCAAAAGCGGCTTTAACTCCCTGCAAGCCTCAGCGA
CCGAATATATCGGTTATGCGTGGGCGATGGTTGTTGTCATTGTGCGGCAACTATCGGTATCAAGCTGTTTAAAGAAATCAACCTCGAAA
CCTAAGCTGATAAACCGATACAATTAAGGCTCCTTTGGAGCCTTTTTTTGGAGATTTTCAACGTGAAAAAATTTATTTTCGCAATTC
CTTAGTTGTTCCCTTCTATTCTCACTCCGCTGAAACTGTTGAAAGTTGTTTAGCAAAATCCCATACAGAAAAATTCATTTACTAACGTC
TGAAAGACGACAAAACTTTAGATCGTTACGCTAACTATGAGGGCTGTCTGTGGAATGCTACAGGCGTTGAGTTGTACTGGTGACGA
AACTCAGTGTACGGTACATGGGTTCTATTGGGCTTGCTATCCCTGAAAAATGAGGGTGGTGGCTCTGAGGGTGGCGGTTCTGAGGGTG
GCGGTTCTGAGGGTGGCGGTAACCTCTGAGTACGGTGATACACTATCCGGGCTACTATATCAACCTCTCGACGGCACT
TATCCGCTGGTACTGAGCAAAACCCGCTAATCCTAATCCTTCTCTGAGGAGTCTCAGCCTCTTAATACTTTTCAGATAA
TAGGTTCCGAAATAGGAGGGGGCATTAACTGTTTATACGGGCACTGTTACTCAAGGCACTGACCCCGTTAAACTTATTACCAGTACA
CTCCTGTATCATCAAAGCCTATGATGACGCTTACTGAAACGGTAAATTCAGAGACTGCGCTTCCATTCTGGCTTAAATGAGGATTTA
TTTGTGTTGTAATATCAAGGCCAATCGCTGACCTGCCTCAACCTCTGTCAATGCTGGCGGCGCTCTGGTGGTGGTCTGGTGGCGG
CTCTGAGGGTGGTGGCTCTGAGGGTGGCGGTTCTGAGGGTGGCGGCTCTGAGGGAGGCGGTTCCGGTGGTGGCTCTGGTCCGGTGATT
TTGATTATGAAAAGATGGCAAAACGCTAATAAGGGGGCTATGACCGAAAAATGCCGATGAAAACGCGCTACAGTCTGACGCTAAAGGCAAA
CTTGATTCTGTGCTACTGATTACGGTGTGCTATCGATGTTTCTATTGGTACGTTTCCGGCTTGCTAATGGTAATGGTGTACTGG
TGATTTTGCTGGCTCTAATCCCAATAGGCTCAAGTCGGTGACGGTGATAATCACCTTAAATGAATAATTTCCGTCGAATTTACCTT
CCCTCCCTCAATCGTTGAATGTCGCCCTTTTGTCTTTGGCGCTGGTAAACCATATGAATTTTCTATTGATTGTGACAAAAATAACTTA
TTCGTTGGTGTCTTTCGTTTCTTTTATATGTTGCCACCTTTATGATGTATTTCTACGTTTGTCTAACATACTGCGTAATAAGGAGCT
TTAATCATGCCAGTTTTCGTTTGGGATTTCCGTTATTATGCGTTTCTCTCGGTTCCCTTCTGGTAACTTTGTTTCGGCTATCTGCTACTTT
TCTTAAAAAGGGCTTCGGTAAGATAGCTATTGCTATTTTCTGCTTATTATTGGGCTTAACTCAATCTTGTGGGTTATC
TCTCTGATATTAGCGCTCAATTACCTCTGACTTTGTTCAAGGGTGTTCAGTTAATTTCCCGCTCAATGCGCTTCCCTGTTTTATGTT
ATTCTCTGTAAAGGCTGCTATTTTCTATTTTACGTTAAACAAAAATCGTTTCTTATTGGATTGGGATAAATAATATGGCTGTTT
ATTTTGTAACTGGCAAAATAGGCTCTGGAAAGACGCTCGTTAGCGTTGGTAAGATTGAGGATAAATTTAGCTGGGTGCAAAATAGCA
ACTAATCTTGATTTAAGGCTTCAAACCTCCCGCAAGTCGGGAGGTTCTGCTAAAACGCTCGCGTTCTTGAATACCGGATAAGCCTTC
TATATCTGATTTGCTTGTCTATTGGGCGCGGTAATGATTCCTACGATGAAAATAAAAACGGCTTGCTTGTCTCGATGAGTGGGTAATTT
GGTTTAAATACCCGTTCTTGAATGATAAGGAAAGACAGCCGATTATTGATTGGTTTTCTACATGCTCGTAAATAGGATGGGATATTATT
TTCTTTGTTCCAGGACTTATCTATTGTTGATAAACAGGCGCTCTGCAATAGCTGAACATGTTGTTTATTGTCGTCGCTGGACAGAAT
TACTTTACCTTTTGTGCGTACTTTATATTCTTATTACTGGCTCGAAAAATGCCTCTGCGCTAAATACATGTTGGCGTTGTTAAATATG
GCGATTCTCAATTAAGCCCTACTGTTGAGCGTTGGCTTATACTGGTAAGAATTTGATAACGCATATGATACTAAACAGGCTTTTCT
AGTAATTTATGATTTCCGGTGTATTCTTATTTAACGCCTTATTATCACACGGTTCGGTATTTCAAACCATTAATTTAGGTCAGAAGAT
GAAATTAACATAAATAATTTGAAAAAGTTTTCTCGCGTCTTTGCTTGGCATTGGATTTGCATCAGCATTACATATAGTTATATAA
CCCAACCTAAGCCGGAGGTTAAAAAGGTAGTCTCTCAGACCTATGATTTTGATAAATCACTATTGACTCTTCTCAGCGCTTAACTTA
AGCTATCGCTATGTTTTCAAGGATTTCAAGGGAAAAATTAATAAGCAGCAGTTTACAGAAGCAAGGTTATCTACTACATATATTGA
TTTATGACTGTTTTCCATTAATAAAGGTAATTAATGAAATTTGTAATTAATTTTGTGTTTCTTGATGTTGTTTTCATCATCT
TCTTTTGTCTCAGGTAATTTGAAATGAATAATTCGCCTCTGCGCGATTTTGAACCTGGTATTCAAAGCAATCAGGCGAATCCGTTATTGT
TTCTCCGATGATAAAGGTAAGTACTGTTACTGTATTTACTGACGTTAAACCTGAAAACTACGCAATTTCTTTATTTCTGTTTTACGTG
CAAAATTTTGTATGGTAGGTTCTAACCTTCCATTTTCAAGGATATAATCCAAACAATCAGGATTATATTGATGAATGGCATA
TCTGATAATCAGGAATATGATGATAATCCGCTCCTTCTGGTGGTTCCTTTGTTCCGCAAAATGATAATGTTACTCAAACCTTTAAAAAT
TAATAACGTTCCGGCAAGGATTTAATACGAGTTGTCGAATTTGTTGTAAGTCTAATACTTCAAATCTCAAATGATTTATCTATTG
ACGGCTCTAATCTATTAGTTGTTAGTGTCTCTAAAGATATTTAGATAACCTTCTCAATCTTCAAACCTGTTGATTGGCAACTGAC
CAGATATTGATTGAGGTTGATATTTGAGGTTACGCAAGGTGATGCTTTAGATTTTCTATTGCTGCTGGCTCTCAGCGTGGCACTGT
```

TGCAGGCGGTGTTAACTGACCGCTCACCTCTGTTTTATCTTCTGCTGGTGGTTCGTTCCGGTATTTTTAATGGCGATGTTTTAGGGC  
TATCAGTTCGCGCATTAAAGACTAATAGCCATTCAAAAATATTGTCTGTGCCACGATTTCTTACGCTTTCAGGTGAGAAAGGGTCTATC  
TCTGTTGGCCAGAATGTCCTTTTATTACTGGTGTGACTGGTGAATCTGCCAATGTAATAATCCATTTACAGCAGATTGAGCGTCA  
AAATGTAGGTATTTCCATGAGCGTTTTTCTGTTGCAATGGCTGGCGGTAATATTGTTCTGGATATTACCAGCAAGGCCGATAGTTGA  
GTTCTTCTACTCAGGCAAGTGATGTTATTACTAATCAAAGAAGTATTGCTACAACGGTAAATTTGCGTGATGGACAGACTCTTTACTC  
GGTGGCCTCACTGATTATAAAAACTTCTCAGGATTCTGGCGTACCGTTCCTGTCTAAAATCCCTTTAATCGGCCTCCTGTTAGCTC  
CCGCTCTGATTCTAACGAGGAAAGCACGTTATACGTGCTCGTCAAAGCAACCATAGTACGCGCCCTGTAGCGGCGCATTAAAGCGCGCG  
GGTGTGGTGGTTACGCGCAGCGTGACCGCTACACTTGCCAGCGCCCTAGCGCCGCTCCTTTTCGCTTTCTTCCCTTCTTTCTCGCCAC  
GTTTCGCGGCTTTCCCGTCAAGCTCTAAATCGGGGCTCCCTTAGGGTTCGATTTAGTGCTTTACGGCACCTCGACCCAAAAAAC  
TTGATTTGGGTGATGTTTACGTAGTGGGCCATCGCCCTGATAGACGGTTTTTCGCCCTTTGACGTTGGAGTCCACGTTCTTAAATAGT  
GGACTCTGTTCCAAACTGGAACAACACTCAACCTTATCTCGGGCTATTCTTTGATTATAAGGGATTTTGGCGATTTCCGAAACACC  
ATCAAACAGGATTTTCGCTGCTGGGGCAAACAGCGTGGACCGCTGTGCAACTCTCTCAGGGCCAGGCGGTGAAGGGCAATCAGCT  
GTTGCCCGTCTCACTGGTGAAGAAAGAAAAACACCCTGGCGCCAATACGCAAAACCGCTCTCCCGCGCGTTGGCCGATTCAATATGC  
AGCTGGCAGCAGGTTTCCGACTGGAAGCGGGCAGTGAGCGCAACGCAATTAATGTGAGTTAGCTCACTCATTAGGCCACCCAGGC  
TTTACACTTTATGCTTCCGGCTCGTATGTTGTGTGGAATTGTGAGCGGATAACAATTTACACAGGAAACAGCTATGACCATGATTACG  
AATTCGAGCTCGGTACCCGGGATCCTCTAGAGTGCACCTGCAGGCATGCAAGCTTGGCACTGGCCGTCGTTTTACAACGTCGTGACTG  
GGAAAACCCCTGGCGTTACCCAACTTAATCGCCTTGCAGCACATCCCTTTTCGCCAGCTGGCGTAATAGCGAAGAGGCCGACACGATC  
GCCCTTCCAAACAGTTGCGCAGCCTGAATGGCGAATGGCGCTTTGCTGGTTTCCGGCACGAGAAGCGGTGCCGAAAGCTGGCTGGAG  
TGCGATCTTCTGAGGCCGATACTGTGCTGCTCCCTCAAACCTGGCAGATGCACGGTACGATGCGCCCATACACCAACGTGACCTA  
TCCCATACGGTCAATCCGCCGTTTGTCCACGGAAGATCCGACGGGTTGTTACTCGCTCACATTTAATGTTGATGAAAGCTGGCTAC  
AGGAAGGCCAGACGCGAATATTTTTGATGGCGTTCCTATTGGTTAAAAATGAGCTGATTTAACAATAATTTAATGCGAATTTAACA  
AAATATTAACGTTTACAATTTAAATATTGCTTATACAATCTTCTGTTTTGGGGCTTTTCTGATTATCAACCGGGGTACATATGATT  
GACATGCTAGTTTTACGATTACCGTTCATCGATTCTTTGTTGTCTCCAGACTCTCAGGCAATGACCTGATAGCCTTTGTAGACTCTC  
AAAAATAGCTACCCTCTCCGGCATTAAATTTATCAGCTAGAACGGTGAATATCATATTGATGGTGAATTTGACTGTCTCCGGCCTTTCTC  
ACCCTTTTGAATCTTTACCTACACATTACTCAGGCATTGCATTTAAAAATATAGAGGGTTCTAAAAATTTTTATCCTTGCCTGAAATA  
AAGGCTTCTCCCGCAAAGTATTACAGGGTCATAATGTTTTGGTACAACCGATTAGCTTTATGCTCTGAGGCTTTATTGCTTAATTT  
TGCTAATCTTTGCTTGCCTGTATGATTTATTGGATGTT

## Supplementary Table 2: Staple sequences

| ID | Description | Sequence                                   |
|----|-------------|--------------------------------------------|
| 1  | Core        | AAAAACCAACCTCGTTGTGAATATGGTTGGTC           |
| 2  | Core        | GGAAGAAGTGTAGCGGTACGTTATAATCAGCAGACTGATAG  |
| 3  | Core        | TACGATATAGATAATCGAACAA                     |
| 4  | Core        | CTTTTGCTTAAGCAATAAAGCGAGTAGA               |
| 5  | Core        | GTCTGAAATAACATCGGTACGGCCGCGCACGG           |
| 6  | Core        | GGAAGAGCCAAACAGCTTGCAGGGAACCTAA            |
| 7  | Core        | AAAATCACCGGAAGCAAACCTCTGTAGCT              |
| 8  | Core        | CCTACATGAAGAACTAAAGGGCAGGGCGGAGCCCCGGGC    |
| 9  | Core        | CATGTAAAAAGGTAAAGTAATAAGAACG               |
| 10 | Core        | ATTAATCAGGTCATTGCTGTCTAGCTGATAAATTGTAATA   |
| 11 | Core        | ATAGTCGTCTTTGCGGTAATGCC                    |
| 12 | Core        | AGTCATGGTCATAGCTGAACTACTGCCAGT             |
| 13 | Core        | AACTATTGACGGAAATTTGAGGGAATATAAA            |
| 14 | Core        | ATCGCGTCTGGAAGTTTCATTCCATATAGAAAGACCATC    |
| 15 | Core        | AAATATTGAACGGTAATCGTAGCCGAGACAGTCATAAAAAAT |
| 16 | Core        | GTCTTTACAGGATTAGTATTCTAACGAGCATAGAACGC     |
| 17 | Core        | GCACCGGACGACGCTAATGAACAGCTG                |
| 18 | Core        | AACTTCATTTTAGAATCGAAATC                    |
| 19 | Core        | CGTAGAGTCTTTGTTAAGGCCTTCGTTTTCTACCGAG      |
| 20 | Core        | CCAATCAAAGGCTTATCCGGTTGCTATT               |
| 21 | Core        | AGAGGCGATATAATCCTGATTATCATA                |
| 22 | Core        | CCGTAATCCCTGAATAATAACGGAATACTACG           |
| 23 | Core        | AAATGGTATACAGGGCAAGGAAATC                  |
| 24 | Core        | TCCTCATCGTAACCAAGACCGACA                   |
| 25 | Core        | CATTATCTGGCTTTAGGGAATTATGTTGGATTAC         |

|    |      |                                                  |
|----|------|--------------------------------------------------|
| 26 | Core | ACCCGCCAATCATTCTCTGTCC                           |
| 27 | Core | CGACCAGTCACGCAGCCACCCTGGCAAAGCGAAAGAAC           |
| 28 | Core | CTAAAGGCGTACTATGGTTGCAACAGGAGAGA                 |
| 29 | Core | TTGGCAGGCAATACAGTGTTTCTGCGGGGCG                  |
| 30 | Core | TATACAGGAAATAAGAAATTTTGCCGAACGTTAAGACTTT         |
| 31 | Core | AAGTATAGTATAAACAGTTAACTGAATTTACCGTTGAGCCAC       |
| 32 | Core | ACATTCAGATAGCGTCCAATATTCAGAA                     |
| 33 | Core | AAACATCTTTACCCTCACCAGTAAAGTGCCCGCC               |
| 34 | Core | GAGATGACCCTAATGCCAGGCTATTTTT                     |
| 35 | Core | TCCTGAATTTTTTGTTAACGATCAGAGCGGA                  |
| 36 | Core | GCCGAAAAATCTAAAGCCAATCAAGGAAATA                  |
| 37 | Core | AGCGTAGCGGTTTTTCAAAAATCTATGTTAGCAAACGAACGCAACAAA |
| 38 | Core | ACCAATCGATTAATTTGCGCCATTATTA                     |
| 39 | Core | ATCTTACTTATTTTACGCGCCGACAGGATTCA                 |
| 40 | Core | CCCTAAAAGAACCCAGTCACA                            |
| 41 | Core | GGAAGGGCGAAAATCGGGTTTTTTCGCGTTGCTCGT             |
| 42 | Core | CAGACCGGAAGCCGCCATTTTGATGGGGTCAGTAC              |
| 43 | Core | TAATATTGGAGCAACAAGAGATCAATATGATATTGCCTTTA        |
| 44 | Core | TTCCTTATAGCAAGCAAATCAAATTTTA                     |
| 45 | Core | ACTACGAGGAGATTTTTTTCAGTTGAAACTTGCTTT             |
| 46 | Core | AAACAGGCATGTCAATCATATAGATTCAAAGGGTTATATTT        |
| 47 | Core | AACAGGCACCAGTTAAAGCCGCTTTTGTAATTTCTTA            |
| 48 | Core | TTCCTGAGTTATCTAAAATATTCAGTTGTTCAAATAGCAG         |
| 49 | Core | AAAGAAACAAGAGAAGATCCGGCT                         |
| 50 | Core | TTGAGGGTTCTGGTCAGGCTGTATAAGC                     |
| 51 | Core | TTTAACCGTCAATAGTGAATTCAAAAGAAGATGATATCGCGC       |
| 52 | Core | ACGAGCGCCAATCAAATAAAATTGAGCACC                   |
| 53 | Core | AATAAGTCGAAGCCCAATAATTATTTATTCTT                 |
| 54 | Core | ACGAAATATCATAGATTAAGAAACAATGGAAGTGA              |
| 55 | Core | TTTCATAGTTGTACCGTAACACTGGGGTTTT                  |
| 56 | Core | AGGAGCGAGCACTAACAACATAAACCTATCACCTAACAGTG        |
| 57 | Core | CAAAGTATTAATTAGCGAGTTTCGCCACAGAACGA              |
| 58 | Core | TGGGGAGCTATTTGACGACTAAATACCATCAGTTT              |
| 59 | Core | ATAACGCAATAGTAAAATGTTAAATCA                      |
| 60 | Core | ACGAATCAACCTTCATCTTATACCGAGG                     |
| 61 | Core | TAATGGTTTGAATAACGCCAA                            |
| 62 | Core | CGGAACAAGAGCCGTCATAGGCACAGACAATATCCTCAATC        |
| 63 | Core | ATTAAAGGTGAATTATCAAAGGGCACCACGG                  |
| 64 | Core | GGCAACCCATAGCGTAAGCAGCGACCATTAA                  |
| 65 | Core | AGAAACGTAAAGCAGCCACAAGGAAACGATCTT                |
| 66 | Core | AGAGGTCTTTAGGGGTCAAAGGCAGT                       |
| 67 | Core | GGGGACTTTTTCATGAGGACCTGCGAGAATAGAAAGGAGGAT       |
| 68 | Core | TTTTAGAACATCCAATAAATCCAATAAC                     |
| 69 | Core | AAATGTGGTAGATGGCCCGCTTGGGGCGC                    |
| 70 | Core | ACGGATCGTCACCCTCACGATCTAGAATTTT                  |
| 71 | Core | CGCCATAAGACGACGACAATAGCTGTCT                     |
| 72 | Core | GCGTATTAGTCTTAAATCGTAAGAATTTACA                  |
| 73 | Core | AGAGAACGTGAATCAAATGCGTATTTCCAGTCCCC              |
| 74 | Core | AACGAAAAAGCGCGAAAAAAGGCTCCAAAAGG                 |



|     |      |                                            |
|-----|------|--------------------------------------------|
| 75  | Core | TAATTTAGAACGCGAGGCGTTAAGCCTT               |
| 76  | Core | ACCAGGCGTGCATCATTAAATTTTTTCAC              |
| 77  | Core | CAGCCTGACGACAGATGTCGCCTGAAAT               |
| 78  | Core | ATTAGTCAGATTGCAAAGTAAGAGTTAAGAAGAGT        |
| 79  | Core | CTCGAATGCTCACTGGCGCAT                      |
| 80  | Core | GGGCAGTCACGACGTTGAATAATTAACAACC            |
| 81  | Core | TAAAAACAGGGGTTTTGTTAGCGAATAATATAATAGAT     |
| 82  | Core | TCAACCCTCAGCGCCGAATATATTAAGAATA            |
| 83  | Core | ATTATACGTGATAATACACATTATCATATCAGAGA        |
| 84  | Core | GCAAATCTGCAACAGGAAAAATTGC                  |
| 85  | Core | ATAATTACTAGAAATCTTAC                       |
| 86  | Core | TATCACCGTGCCTTGAGTAACGCGTCATACATGGCCCTCAG  |
| 87  | Core | AAGTAGGGTTAACGCGCTGCCAGCTGCA               |
| 88  | Core | CCAGTAGTTAAGCCCTTTTTAAGAAAAGCAAA           |
| 89  | Core | TGGCGAAGTTGGGACTTTCCG                      |
| 90  | Core | CAGTGAGTGATGGTGGTTCGAAAACCGTCTATCACGATTTA  |
| 91  | Core | AAATCAAAGAGAATAACATAACTGAACACAGT           |
| 92  | Core | CTGTATGACAACTAGTGCGA                       |
| 93  | Core | ATCATAAATAGCGAGAGGCTTAGCAAAGCGGATTGTTCAAAT |
| 94  | Core | TTGAGTAATTTGAGGATTTAGCTGAAAGGCGCGAAAGATAAA |
| 95  | Core | ATAAGAATAAACACCGCTCAA                      |
| 96  | Core | CGTTGTAATTCACCTTCTGACAAGTATTTTTAA          |
| 97  | Core | AACCGCCTCATAATTCGGCATAGCAGCA               |
| 98  | Core | AAATAGGTCACGTTGGTAGCGAGTCGCGTCTAATTCGC     |
| 99  | Core | CAGTATAGCCTGTTTATCAACCCCATCC               |
| 100 | Core | TTGCACCTGAAAATAGCAGCCAGAGGGTCATCGATTTTCGGT |
| 101 | Core | CGTCGGAAATGGGACCTGTGCGGGGAGA               |
| 102 | Core | AAGAAACTAGAAGATTGCGCAACTAGGG               |
| 103 | Core | CCAGAACC TGGCTCATTATACAATTACG              |
| 104 | Core | ACGGGTAATAAATTAAGGAATTGCGAATAGTA           |
| 105 | Core | CCACGCTGGCCGATTCAAACATATCGGCCCGCT          |
| 106 | Core | GCCTTCACCGAAAGCCTCCGCTCACGCCAGC            |
| 107 | Core | CAGCATTAAAGACAACCGTCAAAAATCA               |
| 108 | Core | ACATCGGAAATTATTTGCACGTAAGT                 |
| 109 | Core | CAACGGTCGCTGAGGCTTGATACCTATCGGTTTATCAGATCT |
| 110 | Core | AAATCGTACGTACATAAAATCAGATGAA               |
| 111 | Core | TTAACACACAGGAACACTTGCCCTGAGTATTTG          |
| 112 | Core | AGGCATAAGAAGTTTTGCCAGACCCTGA               |
| 113 | Core | GACGACATTCAACCAGAGATTAAGCCTATTAACCA        |
| 114 | Core | AGCTGCTCGTTAATAAAACGAGAATACC               |
| 115 | Core | CTTAGAGTACCTTTTAAACAGCTGCGGAGATTTAGACTA    |
| 116 | Core | CACCCTCTAATTAGCGTTTGCTACATAC               |
| 117 | Core | GAACCGAAAATTGGGCTTGAGTACCTTATGCGATTCAACACT |
| 118 | Core | GCAAGGCAGATAACATAGCCGAACAAAGTGGCAACGGGA    |
| 119 | Core | ATGAAACAATTGAGAAGGAAACCGAGGATAGA           |
| 120 | Core | GGATGTGAAATTGTTATGGGGTGCACAGTAT            |
| 121 | Core | GGCTTGCACGTTGGGAAGAACAGATAC                |
| 122 | Core | TAAATGCCTACTAATAGTAGTTTTTCATT              |
| 123 | Core | TGCCGCTGCCTATTTGGAACCGAATGGAAGCCACCAGAAC   |

|     |      |                                                       |
|-----|------|-------------------------------------------------------|
| 124 | Core | TGACCATAGCAAAAGGGAGAACAAAC                            |
| 125 | Core | CGAGCCAGACGTTAATAATTTGTATCA                           |
| 126 | Core | GCTCAGTTTCTGAAACATGAAACAAATAATCCTCCCGCCGC             |
| 127 | Core | AGACGCTACATCAAGAAAACACTTTGAA                          |
| 128 | Core | AGTACTGACCAATCCGCGAAGTTTAAGACAG                       |
| 129 | Core | GATTCCTGTTACGGGCAGTGAGCTTTTCCTGTGTGCTG                |
| 130 | Core | GGTATTAAGGAATCATTACCGAACGCTA                          |
| 131 | Core | GTTTCATCAATAAAAACGCGACTCTAGAGGATCGGG                  |
| 132 | Core | AGCCTTTAATTGGATAGTTGAACCGCCACCTCATAGGTG               |
| 133 | Core | ACAGAGGCTGAGATTCTTTGATTAGTAATGG                       |
| 134 | Core | AACGAGATCAGGATTAGAGAGCTTAATT                          |
| 135 | Core | TACCAAGTTATACTTCTGAATCACCAGA                          |
| 136 | Core | CAGTAGGTGTTGAGTAATGCGTAGAAA                           |
| 137 | Core | AGGATGACCATAGACTGACTAATGAAATCTACATTCAGCAGGCGCGTAC     |
| 138 | Core | TTTCAACCAAGGCAAAGAATTTAGATAC                          |
| 139 | Core | TTGAAATTAAGATAGCTTAACAT                               |
| 140 | Core | CTATTATCGAGCTTCAAAGCGTATGCAA                          |
| 141 | Core | CAGGGTGCAAAATCCCTTATAGACTCCAACGTCAAAGCCGG             |
| 142 | Core | GAGCTTGTAAATGCGCCGCTAATTTTAGCGCTGCTGCTGAA             |
| 143 | Core | CGAACGTTAACCACCACACCCCAAGATTGAG                       |
| 144 | Core | GTGTGATAAATAAGTGAGAAT                                 |
| 145 | Core | GCTATATAGCATTAAACCTCAGAGA                             |
| 146 | Core | AGGAGAGCCGGCAGTCTTGCCCCGAGAGGGAGGG                    |
| 147 | Core | CGGCCTCCAGCCAGAGGGCGAGCCCAA                           |
| 148 | Core | CCAAAACAAAATAGGCTGGCTGACGTAACAA                       |
| 149 | Core | GGCGGTTAGAATAGCCGAGAAGTCCACTATTA AAAAGGAAG            |
| 150 | Core | ATAAAGGTTACCAGCCTAATTCAAAACAGC                        |
| 151 | Core | ATTGCCCCAGCAGGCGAAAAGGCCACTACGTGACGGAACC              |
| 152 | Core | TTTTAAACATAACAGTAATGGAACGCTATTAGAACGC                 |
| 153 | Core | AATTGGGTAAACGCCAGGCTGTAGCCAGCTAGTAAACGT               |
| 154 | Edge | TTACCCAGAACAACATTATTACAGGTTTTTTTTTTTTTTTT             |
| 155 | Edge | TTTTTTTTTTTTTTTTAATAAGAGAATA                          |
| 156 | Edge | TTTTTTTTTTTTTTTTCCAGTTTTGGGAGCGGGCTTTTTTTTTTTTT       |
| 157 | Edge | GGTTGAGGCAGGT CAGTTTTTTTTTTTTTTTT                     |
| 158 | Edge | TTTTTTTTTTTTTTTGATTAAGACTCCTTATCCAAAAGGAAT            |
| 159 | Edge | TTTTTTTTTTTTTTTTCTTCGCTATTACAATT                      |
| 160 | Edge | TTTTTTTTTTTTTTTCTTGCGGGAGAAGCGCATTTTTTTTTTTTTTTT      |
| 161 | Edge | TTTTTTTTTTTTTTTGGGAATTAGAGAAACAATGAATTTTTTTTTTTTTTT   |
| 162 | Edge | TCAGACTGACAGAATCAAGTTTGTTTTTTTTTTTTTTTTT              |
| 163 | Edge | TTTTTTTTTTTTTTTGGTCGAGGTGCCGTAAGCAGCACGT              |
| 164 | Edge | TTTTTTTTTTTTTTTTAATCATTTACCAGACTTTTTTTTTTTTTTT        |
| 165 | Edge | TTTTTTTTTTTTTTTCATTCTGGCCAAATTCGACAACCTTTTTTTTTTTTTTT |
| 166 | Edge | TTTTTTTTTTTTTTTACCGGATATTCA                           |
| 167 | Edge | TTTTTTTTTTTTTTTTTAGACGGGAAACTGGCATTTTTTTTTTTTTTTT     |
| 168 | Edge | TTTTTTTTTTTTTTTTCAGCAAGCGGTCCACGCTGCCCAAAT            |
| 169 | Edge | CTGAGAGAGTTGTTTTTTTTTTTTTTTT                          |
| 170 | Edge | CAATGACAACAACCATTTTTTTTTTTTTTTTT                      |
| 171 | Edge | TTTTTTTTTTTTTTTTGAGAGATCTACAAGGAGAGG                  |
| 172 | Edge | TCACCAGTACAACTATTTTTTTTTTTTTTTTT                      |

|     |      |                                                         |
|-----|------|---------------------------------------------------------|
| 173 | Edge | TTTTTTTTTTTTTTGGCAATTCATCAAATTATTCATTTTTTTTTTTTTTTTT    |
| 174 | Edge | TAAAGTTACCGCACTCATCGAGAACTTTTTTTTTTTTTTTTT              |
| 175 | Edge | TTTTTTTTTTTTTTTACCCTCAGAACC GCC                         |
| 176 | Edge | TTTTTTTTTTTTTTAGTTTAACGTCAATATATGTGAGTTTTTTTTTTTTTT     |
| 177 | Edge | CCACACAACATACGTTTTTTTTTTTTTT                            |
| 178 | Edge | TTTTTTTTTTTTTTTGCTAGGGCAGTAAAAGATTTTTTTTTTTTTTTTT       |
| 179 | Edge | TTTTTTTTTTTTTTTAGTTGATCCCAATCTGCGAACCTCA                |
| 180 | Edge | TTATTTAGAGCCTAATTTGCCAGTTTTTTTTTTTTTTTTTT               |
| 181 | Edge | TTTTTTTTTTTTTTTACGGCGGAT                                |
| 182 | Edge | TTTTTTTTTTTTTTTATATGCGTTAAGTCCTGATTTTTTTTTTTTTTTTT      |
| 183 | Edge | TTTTTTTTTTTTTTTACGATTGGCCTTGATA                         |
| 184 | Edge | TTTTTTTTTTTTTTTCAACGCCTGTAGCATT                         |
| 185 | Edge | TTTTTTTTTTTTTTTGGCTTTGAGCCGGAACGATTTTTTTTTTTTTTTTT      |
| 186 | Edge | TTTTTTTTTTTTTTTAAAGCAAGCCGTTT                           |
| 187 | Edge | TTTTTTTTTTTTTTTATGTGTAGGTAAGTACCCCGTTGTTTTTTTTTTTTTT    |
| 188 | Edge | ATCGTCATAAATATTCAATTTTTTTTTTTTTTTTTTT                   |
| 189 | Edge | TTTTTTTTTTTTTTTGTAAATTCATCT                             |
| 190 | Edge | TTTTTTTTTTTTTTGTATTAATCCTGCGTAGATTTCTTTTTTTTTTTTTTT     |
| 191 | Edge | GCCATATAAGAGCAAGCCAGCCCGACTTGAGCCATGGTT                 |
| 192 | Edge | GTAGCTAGTACCAAAAACATTCATAAAGCTAAATCGGTTTTTTTTTTTTTT     |
| 193 | Edge | ATAACGTGCTTTTTTTTTTTTTTTTTTT                            |
| 194 | Edge | TTTTTTTTTTTTTTTAAAATACCGAACGAACCACAGTGAGAATTAAC         |
| 195 | Edge | TTTTTTTTTTTTTTTACAAAATAACA                              |
| 196 | Edge | TTTTTTTTTTTTTTTACAAGAAAACCTCCCGATTTTTTTTTTTTTTTTT       |
| 197 | Edge | TTTTTTTTTTTTTTTGACGATAAAAAGATTAAGTTTTTTTTTTTTTTTTTT     |
| 198 | Edge | TTTTTTTTTTTTTTTCAATTACCTGAGTATCAAAATCATTTTTTTTTTTTTTTT  |
| 199 | Edge | GGTACGGCCAGTGCCAAGCTTTTTTTTTTTTTTTTT                    |
| 200 | Edge | TTTTTTTTTTTTTTTGAATAACCTTGAAATATATTTATTTTTTTTTTTTTTTTT  |
| 201 | Edge | CACTAAAACACTTTTTTTTTTTTTTTTT                            |
| 202 | Edge | TTTTTTTTTTTTTTTAAACCAATATGGGAACAATTTTTTTTTTTTTTTTTTT    |
| 203 | Edge | TACGTCACAATCAATAGAATTTTTTTTTTTTTTTTT                    |
| 204 | Edge | TTTTTTTTTTTTTTTAGAAAAGATTCATCAGTTGA                     |
| 205 | Edge | TTTTTTTTTTTTTTGTGGCATCAATTAATGCCTGAGATTTTTTTTTTTTTTTTT  |
| 206 | Edge | TTTTTTTTTTTTTTTGCATGCCTGCATTAATTTTTTTTTTTTTTTTTTT       |
| 207 | Edge | CCAGCGAAAGAGTAATCTTGACAAGATTTTTTTTTTTTTTTTT             |
| 208 | Edge | TTTTTTTTTTTTTTTGAATCCCCCTCAAATGCTT                      |
| 209 | Edge | AGAGGCTGAGACTCCTTTTTTTTTTTTTTTTT                        |
| 210 | Edge | ACAAACACAGAGATACATCGCCATTATTTTTTTTTTTTTTTTT             |
| 211 | Edge | TTTTTTTTTTTTTTTCAAGAGAAGGATTAGG                         |
| 212 | Edge | TTTTTTTTTTTTTTTGAATTGAGGAAGTTATCAGATGATTTTTTTTTTTTTTTTT |
| 213 | Edge | CAGAACAATATTTTTTTTTTTTTTTTT                             |
| 214 | Edge | TTTTTTTTTTTTTTTAGCCGGAAGCATAAAGTGTCTGGCC                |
| 215 | Edge | TGACCGTTCTCCGGGAACGCAAATCAGCTCATTTTTTTTTTTTTTTTTTTT     |
| 216 | Edge | TTTTTTTTTTTTTTTGGTAATAAGTTTAAAC                         |
| 217 | Edge | TTTTTTTTTTTTTTTGTCTGTCCATAATAAAAAGGGATTTTTTTTTTTTTTTTT  |
| 218 | Edge | TTTTTTTTTTTTTTTCTCGTTAGAATCAGAGCGTAATATC                |
| 219 | Edge | AATTGCTCCTTTGATAAGTTTTTTTTTTTTTTTT                      |
| 220 | Edge | CATCGGACAGCCCTGCTAAACAACCTTCAACAGTTTTTTTTTTTTTTTTTT     |
| 221 | Edge | TTTTTTTTTTTTTTTAAACCGCCTCCCTCAGACCAGAGC                 |

|     |                |                                                      |
|-----|----------------|------------------------------------------------------|
| 222 | Edge           | TCTGACAGAGGCATTTTCGAGCCAGTTTTTTTTTTTTTTTT            |
| 223 | Edge           | TTTTTTTTTTTTTTTTTTCAGCGGAGTCCATGTCATAAGG             |
| 224 | Edge           | TTTTTTTTTTTTTTTTTCGCCACGCATAACCG                     |
| 225 | Edge           | AATACTTAGGACTAAATAGCAACGGCTACAGATTTTTTTTTTTTTTT      |
| 226 | Edge           | CAAGTTTTTGGTTTTTTTTTTTTTTTT                          |
| 227 | Edge           | TTTTTTTTTTTTTTCTTTAGCGCACCACCGTTTTTTTTTTTTTTTT       |
| 228 | Edge           | TTTTTTTTTTTTTTGAATCGGCCGAGTGTTGTTTTTTTTTTTTTTTT      |
| 229 | Edge           | TTTTTTTTTTTTTTCATCTTTGACCC                           |
| 230 | Edge           | TTTTTTTTTTTTTATAATCAGAAAATCGGTGCGGGCCTTTTTTTTTTTTT   |
| 231 | Edge           | GATACAGGAGTGACTTTTTTTTTTTTTTTTT                      |
| 232 | Edge           | TTTTTTTTTTTTTTGGCGCAGACAATTTCAACTTTTTTTTTTTTTTTTT    |
| 233 | Edge           | GGAGGTTTAGTACCGCTTTTTTTTTTTTTTTTT                    |
| 234 | Edge           | TTTTTTTTTTTTTTACCGCCAGCCATAACAGTTGAAAGTTTTTTTTTTTTTT |
| 235 | Edge           | TTTTTTTTTTTTTTTATAGCAATAGCT                          |
| 236 | Handles        | AATAAGTTTTGCAAGCCAATAGGGGATAAGTTGTGCTACTCCAGTTC      |
| 237 | Handles        | ACATAGCTTACATTTAACAATAATAACGTTGTGCTACTCCAGTTC        |
| 238 | Handles        | CCTTTTGAATGGCGTCAGTATTGTGCTACTCCAGTTC                |
| 239 | Handles        | CGTAACCAATTCATCAACATTTTGTGCTACTCCAGTTC               |
| 240 | Handles        | CACCAACCGATATTCATTACCATTATTGTGCTACTCCAGTTC           |
| 241 | Handles        | CCACCCTCATTTTCTTGATATTTGTGCTACTCCAGTTC               |
| 242 | Handles        | AACTTTGAAAGAGGAGAAACATTGTGCTACTCCAGTTC               |
| 243 | Handles        | CAAGGCGCGCCATTGCGGAATTGTGCTACTCCAGTTC                |
| 244 | Handles        | CATAGCCCCCTAAGTCACCATTGTGCTACTCCAGTTC                |
| 245 | Handles        | TTTCCCTGAATTACCTTTTTTACCTTTTTTGTGCTACTCCAGTTC        |
| 246 | Handles        | AACGGTGTACAGACTGAATAATTGTGCTACTCCAGTTC               |
| 247 | Handles        | GATTCGCGGGTTAGAACCTACCATTTTGTGCTACTCCAGTTC           |
| 248 | Guides         | AGAGTAGGATTTTCGCCAACATGTTTTAAAAACC                   |
| 249 | Guides         | ACGGTGACCTGTTTAGCTGAATAAATGCCAAC                     |
| 250 | Guides         | CGTAGCAATTTAGTTCTAAAGTACGGTGTTTA                     |
| 251 | Guides         | GCTTAATGCGTTAAATGTAAATGCTGATCTTGAAATGAGCGTT          |
| 252 | Guides         | AAGCCAACGGAATCTAGGTTGGGTTATATAGATTAAGCAACTG          |
| 253 | Guides         | TTTAAACAACCGACCCAATCGCAAGACAAAATTAATCTCACTGC         |
| 254 | Guides         | TTTAGGCCATAAATTGAGAAAACTTTTCCCTCTGTTCCTAGAT          |
| 255 | Guides Removal | GGTTTTTAAACATGTTGGCGAAATCCTACTCT                     |
| 256 | Guides Removal | GTTGGCATTATATTCAGCTAAACAGGTCACCGT                    |
| 257 | Guides Removal | TAAAACACCGTACTTTAGAATAAATTGCTACG                     |
| 258 | Guides Removal | AACGCTCATTTCAAGATCAGCATTTACATTTAACGCATTAAGC          |
| 259 | Guides Removal | CAGTTGCTTAATCTATATAACCCAACCTAGATTCGGTTGGCTT          |
| 260 | Guides Removal | GCAGTGAGATTAATTTGTCTTGCGATTGGGTCGGTTGTAA             |
| 261 | Guides Removal | ATCTAGGAACAGAAGGAAAAAGTTTTCTCAATTTAGGCCTAAA          |

To fold the robots, scaffold and staple DNA were mixed at a ratio of 1:10, respectively, in Tris-Acetate-EDTA buffer supplemented with 10 mM MgCl<sub>2</sub>. The mixture was subjected to a temperature-annealing ramp in the following sequence: 1) from 85°C to 60° C, 5 min/°C; 2) from 60 °C to 25 °C, 75 min/°C. Subsequently, excess staples were

removed by centrifugal filtration using Amicon Ultra-0.5mL 100K MWCO centrifugal filters (Millipore).

### **Payload synthesis**

GFP was fused to loading-sequence DNA (5AmMC6/GAACTGGAGTAGCAC Integrated DNA Technologies) by EDC conjugation according to the manufacturer's instructions. Anti-human p75/AIRM Fab' fragments were obtained by digesting whole IgG using a Fab' generation kit (Pierce) according to the manufacturer's instructions. After purification, Fab' fragments were fused to loading sequence DNA by EDC conjugation.

### **Robot loading and purification**

100 pmol folded robots were loaded with autoinducer and payload (at a 3:1 ratio) by incubation at a 5-fold molar excess of mixture to loading sites. Loading was performed for 2 hours on a rotary shaker at room temperature in folding buffer (10 mM MgCl<sub>2</sub> in 1X TAE). Finally, loaded robots were cleaned by centrifugal filtration with a 100K MWCO Amicon column (Millipore) as described above.

Loading in this design was done stochastically. However, by redesigning the loading site sequences and autoinducer/payload specificities, loading can be directed to specific sites. However, stochastic loading was effective (albeit potentially less optimal than directed loading), for the following reasons: a) robots containing only autoinducer can serve as autoinducer sources indicating population size; b) robots containing only payload (GFP/Fab') respond to external autoinducer and contribute to the readout; and c) robots containing both serve both functions.

## Supplementary Note 2: QS system design

5'-amine-modified linker oligonucleotide (5AmMC6/TTTTTGAAGTGGAGTAGCAC, Integrated DNA Technologies) was conjugated using the heterobifunctional crosslinker SMCC to the C-terminal thiol group in Lys-Pro-Leu-Gly-Met-Trp-Ser-Arg-Cys (custom ordered from American Peptide Company), containing the cleavage site of MMP-2. according to the manufacturer instruction, at a DNA:peptide ratio of 1:2. After quenching with 2-mercaptoethanol and purification, the oligonucleotide-peptide hybrid was further conjugated with PDGF using EDC crosslinking, purified and verified with spectrophotometry to yield to complete autoinducer. The cleaved autoinducer maintained its ability to bind to anti-PDGF antibodies as well as to the PDGF aptamer.

Kinetics of peptide cleavage by MMP-2 was measured by fluorometry using a fluorogenic MMP-2/MMP-2 substrate (5  $\mu$ M) and human recombinant MMP-2 in assay buffer (Tris-EDTA containing 150 mM NaCl, 10 mM MgCl<sub>2</sub> and 1  $\mu$ M ZnSO<sub>4</sub>, pH 7.5) at room temperature. The desired concentration of MMP-2 for this study was fixed at 5  $\mu$ g/mL (**Fig. S1**).

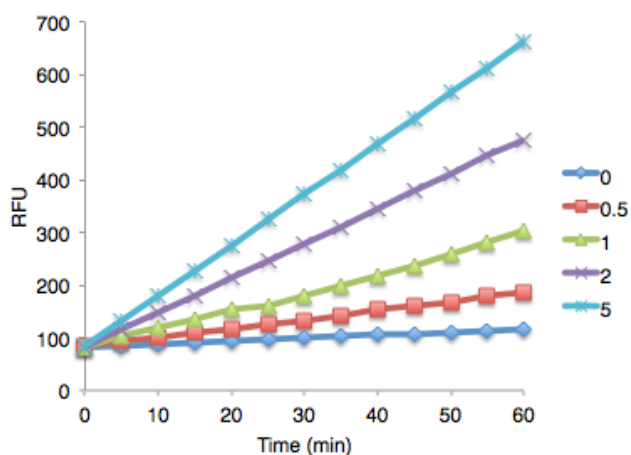

**Fig. S1:** MMP-2 calibration assay, used to determine desired MMP-2 concentration for the purpose of activating QS in robots for this study (see above for detail).

To evaluate the kinetics of autoinducer release from robots, autoinducer-loaded robots were exposed to MMP-2 (5  $\mu$ g/mL) for 1 h at room temperature, after which the samples were measured directly in a PDGF ELISA (**Fig. S2**).

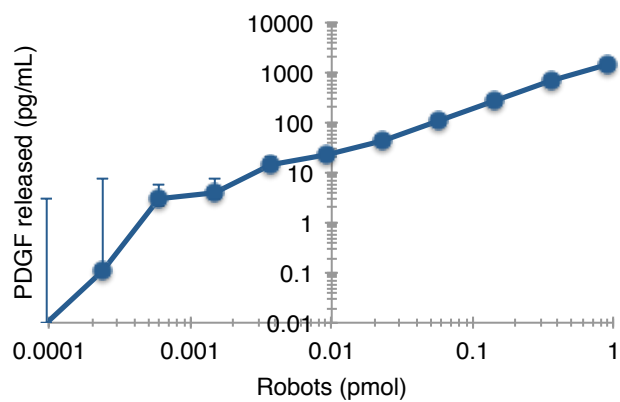

**Fig. S2: Autoinducer release from MMP-2 treated robots.**

### **Supplementary Note 3: Cell culture**

Jurkat cells were obtained from American Type Culture Collection (ATCC) and maintained at 37 deg. and 5% CO<sub>2</sub> in RPMI 1640 containing 10% fetal calf serum. Prior to incubation with robots, cells were diluted to a density of 100,000 cells/mL in 96 well plates and activated with 200 ng/mL of recombinant human IL-6 (Peprotech) overnight. Following activation, the cells were treated with varying concentrations of either free anti-p75/AIRM Fab' fragments (cross-linked by 25 ug/mL secondary anti-mouse IgM), or the equivalent amount of Fab' fragments loaded into QS-regulated robots, for 24 hours. Following this period, the cells were analyzed for cell cycle distribution using propidium iodide as previously described.

### **Supplementary Note 4: Dynamic light scattering and flow cytometry**

Dynamic light scattering was performed using a Malvern Zetasizer Nano instrument using various concentrations of robots in Tris-EDTA buffer supplemented with 10 mM MgCl<sub>2</sub>. The minimal robot concentration that enabled reliable detection (based on good correlation function) was 29 pM, and the results obtained were good as a qualitative confirmation of QS-driven switch from closed to open state.

The advantage of flow cytometry is the use of target-coated microspheres, which isolate from any population only the robots that open and directly bind them, allowing much more reliable measurements and at lower population densities. Flow cytometry was performed using an Accuri C6 flow cytometer equipped with 488 nm and 640 nm lasers, and analyzed with FlowPlus software. Cell cycle analysis was done using propidium iodide as previously described.
